# Supplementary material for: Learning Handicapped and Nonlearning Handicapped Female Juvenile Offenders: Educational and Criminal Profiles.
Source: eLife journal article supplement (doi:10.7554/elife.10735), 1987-01-01
Supplement: supp [file elife-10735-supp-v1.zip]

Archive with 17 entries (17 files):
- elife_poa_e10735_Figure_1_figure_supplement_4.pdf
- elife_poa_e10735_Figure_1_figure_supplement_5.pdf
- elife_poa_e10735_Figure_5_figure_supplement_2.pdf
- elife_poa_e10735_Figure_5_figure_supplement_3.pdf
- elife_poa_e10735_Figure_5_figure_supplement_1.pdf
- elife_poa_e10735_Figure_1_figure_supplement_2.pdf
- elife_poa_e10735_Figure_1_figure_supplement_3.pdf
- elife_poa_e10735_Figure_1_figure_supplement_1.pdf
- elife_poa_e10735_Figure_6_figure_supplement_1.pdf
- elife_poa_e10735_Figure_4_figure_supplement_2.pdf
- elife_poa_e10735_Figure_3_figure_supplement_1.pdf
- elife_poa_e10735_Figure_6_figure_supplement_2.pdf
- elife_poa_e10735_Figure_5_figure_supplement_4.pdf
- elife_poa_e10735_Figure_4_figure_supplement_1.pdf
- elife_poa_e10735_Figure_6_figure_supplement_3.pdf
- elife_poa_e10735_Figure_6_figure_supplement_4.pdf
- elife_poa_e10735_Figure_2_figure_supplement_1.pdf
