# Supplementary material for: Learning Handicapped and Nonlearning Handicapped Female Juvenile Offenders: Educational and Criminal Profiles.
Source: eLife journal article supplement (doi:10.7554/elife.10735), 1987-01-01

Figure 3 – Figure Supplement 1. Control genotypes for electrophysiology recordings of class IV neurons.

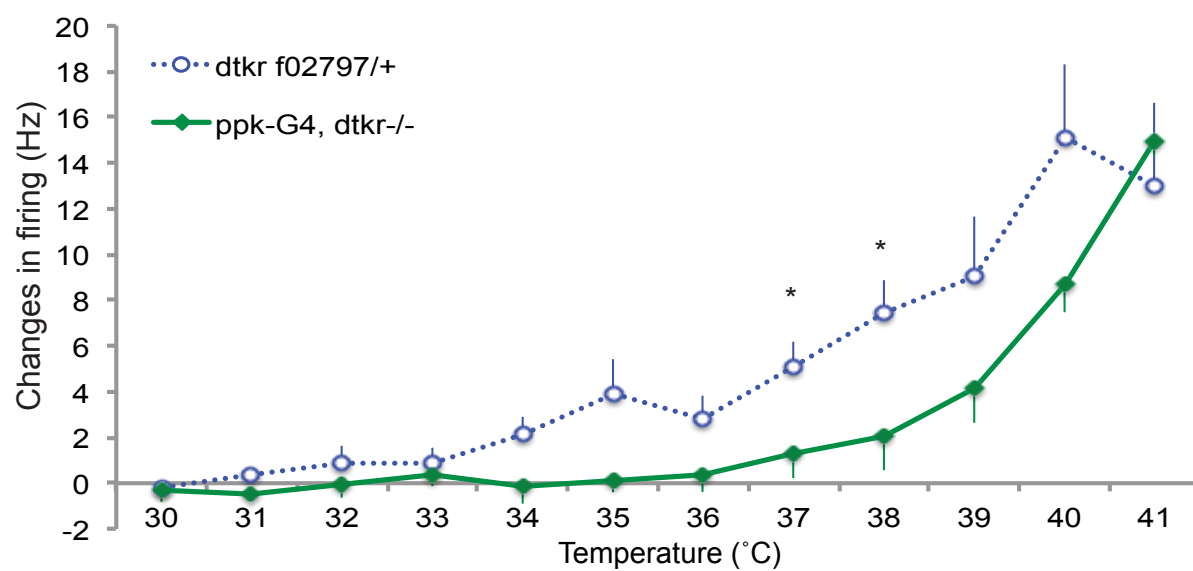

Supplement: supp [file elife-10735-supp-v1.zip]
