# Supplementary material for: Learning Handicapped and Nonlearning Handicapped Female Juvenile Offenders: Educational and Criminal Profiles.
Source: eLife journal article supplement (doi:10.7554/elife.10735), 1987-01-01

Figure 1 – Figure Supplement 2. Dissected larval brain whole mounts of *Elav/+* and *Elav>dTk<sup>RNAi</sup>* immunostained with anti-LemTRP.

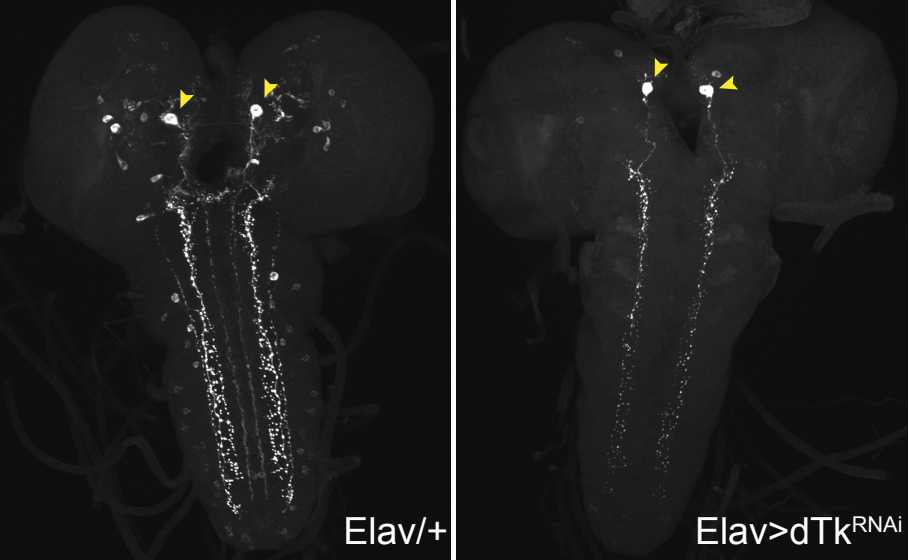

Supplement: supp [file elife-10735-supp-v1.zip]
