# Supplementary material for: Learning Handicapped and Nonlearning Handicapped Female Juvenile Offenders: Educational and Criminal Profiles.
Source: eLife journal article supplement (doi:10.7554/elife.10735), 1987-01-01

Figure 1 – Figure Supplement 1. Tachykinin is not expressed in class IV md nociceptive sensory neurons.

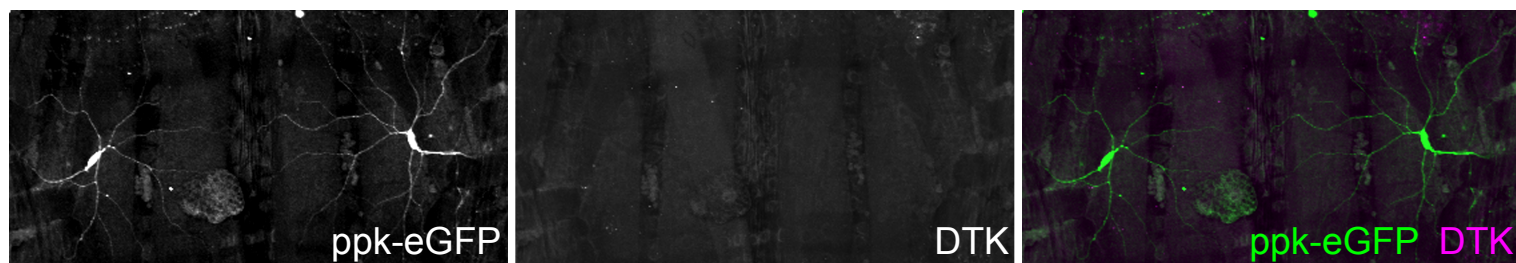

Supplement: supp [file elife-10735-supp-v1.zip › elife_poa_e10735_Figure_1_figure_supplement_1.pdf]
