# Supplementary material for: Learning Handicapped and Nonlearning Handicapped Female Juvenile Offenders: Educational and Criminal Profiles.
Source: eLife journal article supplement (doi:10.7554/elife.10735), 1987-01-01

Figure 4 – Figure Supplement 2. UAS alone controls of RNAi targeting G protein subunits do not exhibit defects in UV-induced thermal allodynia

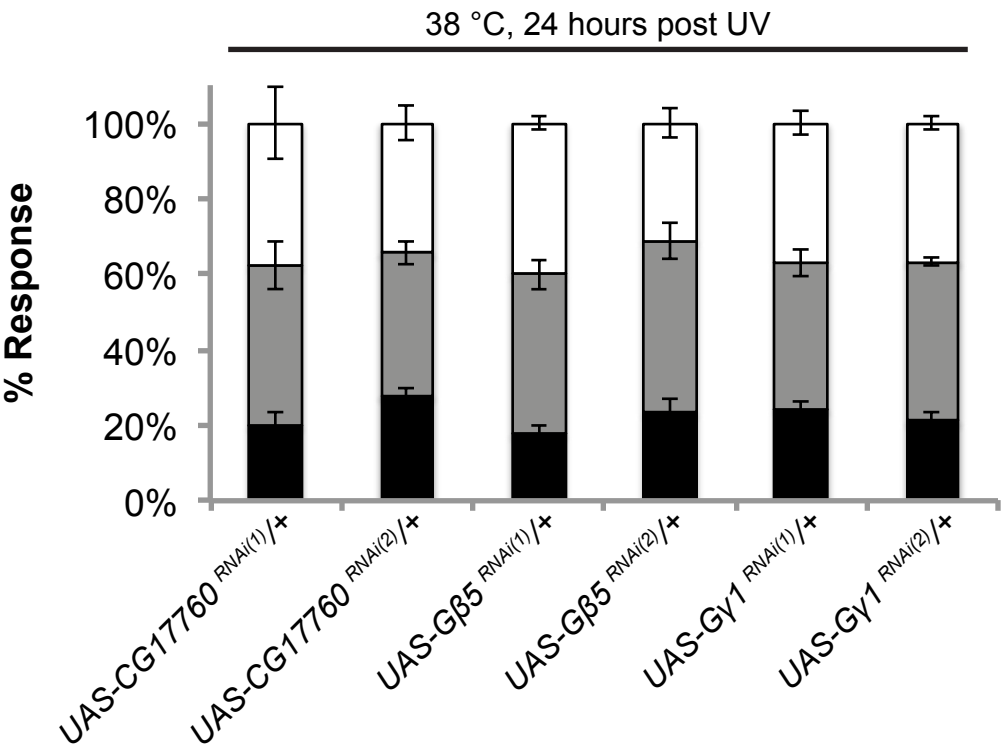

Supplement: supp [file elife-10735-supp-v1.zip › elife_poa_e10735_Figure_4_figure_supplement_2.pdf]
