# Supplementary material for: Learning Handicapped and Nonlearning Handicapped Female Juvenile Offenders: Educational and Criminal Profiles.
Source: eLife journal article supplement (doi:10.7554/elife.10735), 1987-01-01

Figure 5 – Figure Supplement 4. The *pain*<sup>70</sup> deletion allele and *UAS-pain*<sup>RNAi</sup> transgenes cause defects in baseline thermal nociception

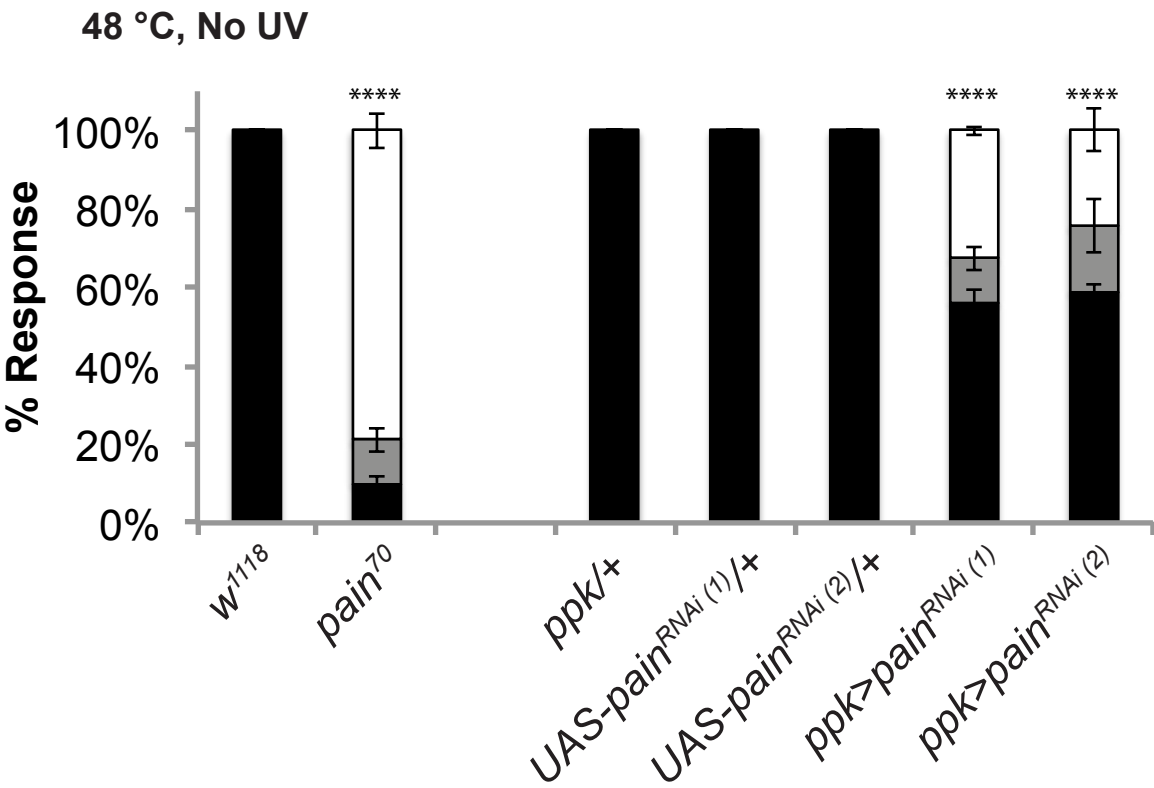

Supplement: supp [file elife-10735-supp-v1.zip › elife_poa_e10735_Figure_5_figure_supplement_4.pdf]
