# Supplementary figures and images for: Learning Handicapped and Nonlearning Handicapped Female Juvenile Offenders: Educational and Criminal Profiles.
Source: eLife journal article supplement (doi:10.7554/elife.10735), 1987-01-01

Figure 1 – Figure Supplement 4. Temperature versus behavior dose response curves.

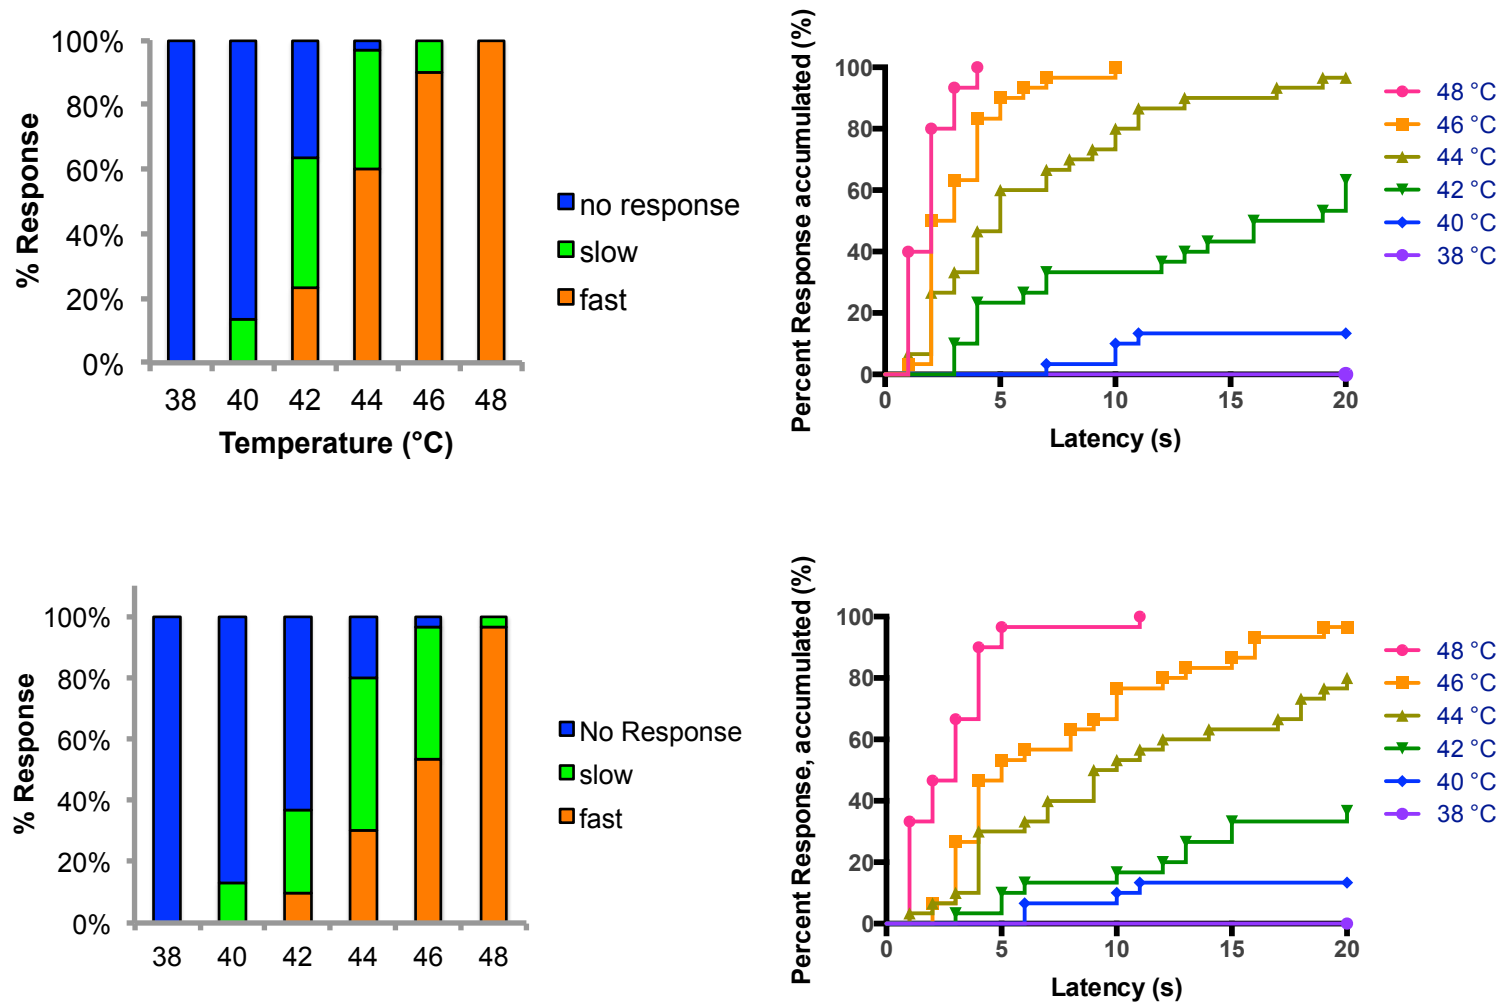

Supplement: supp [file elife-10735-supp-v1.zip › elife_poa_e10735_Figure_1_figure_supplement_4.pdf]

Figure 1 – Figure Supplement 5. Alternative data presentation of thermal allodynia.

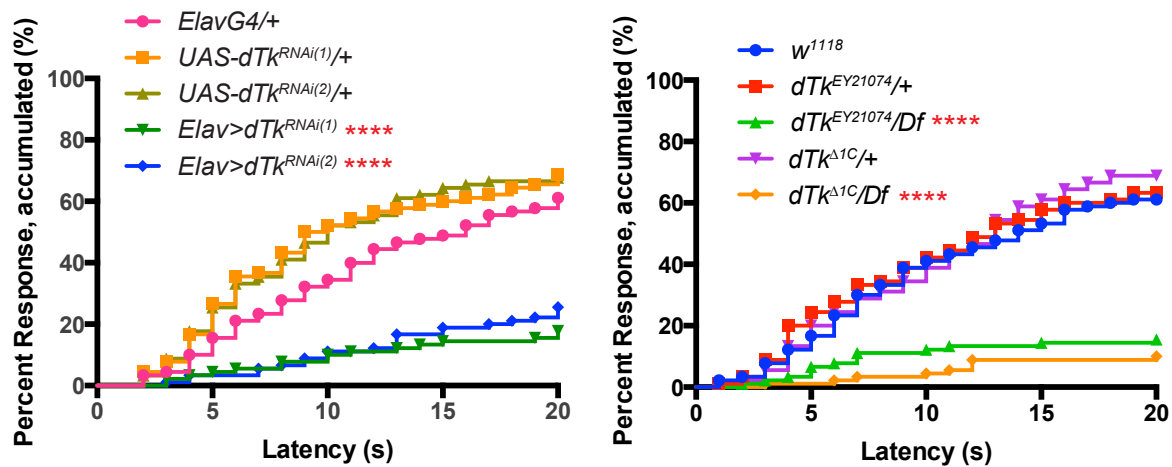

Supplement: supp [file elife-10735-supp-v1.zip › elife_poa_e10735_Figure_1_figure_supplement_5.pdf]

Figure 5 – Figure Supplement 2. Genetic epistasis tests between DTKR and TNF pathway.

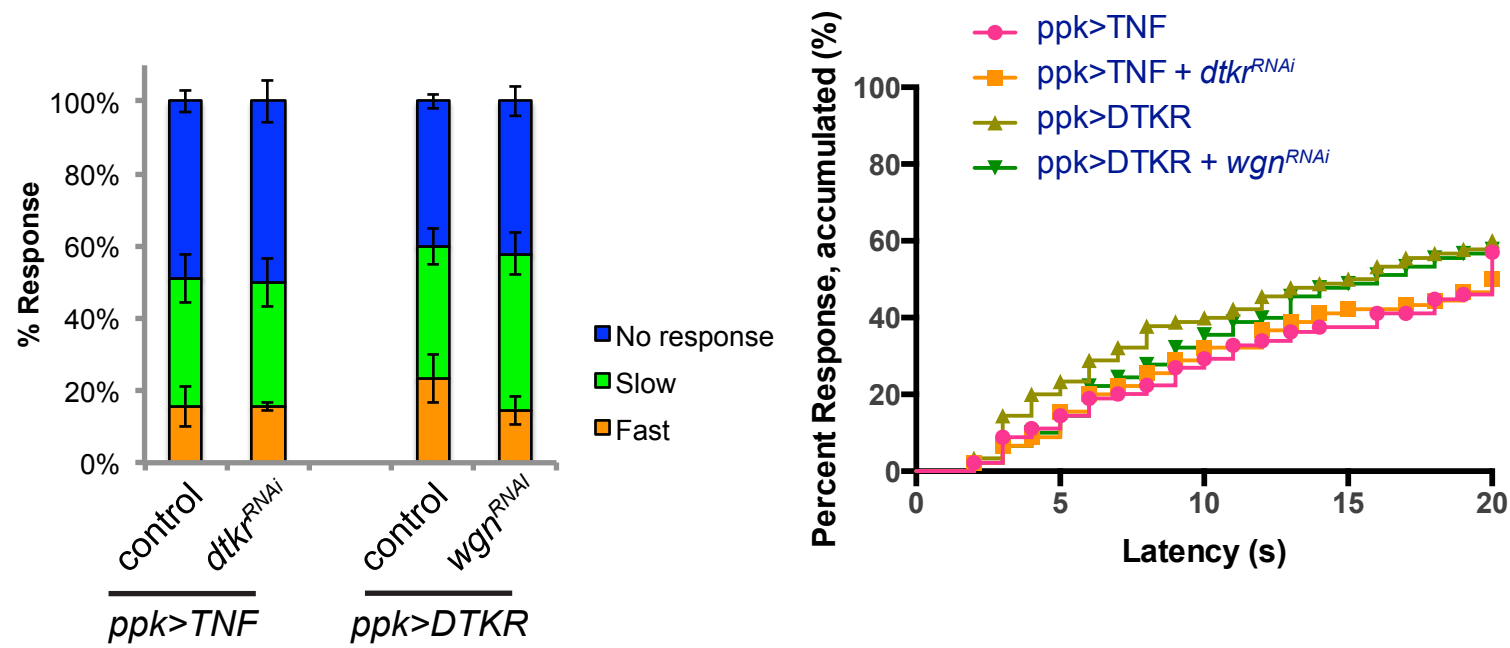

Supplement: supp [file elife-10735-supp-v1.zip › elife_poa_e10735_Figure_5_figure_supplement_2.pdf]

Figure 5 – Figure Supplement 3. Schematic of *painless* genomic locus.

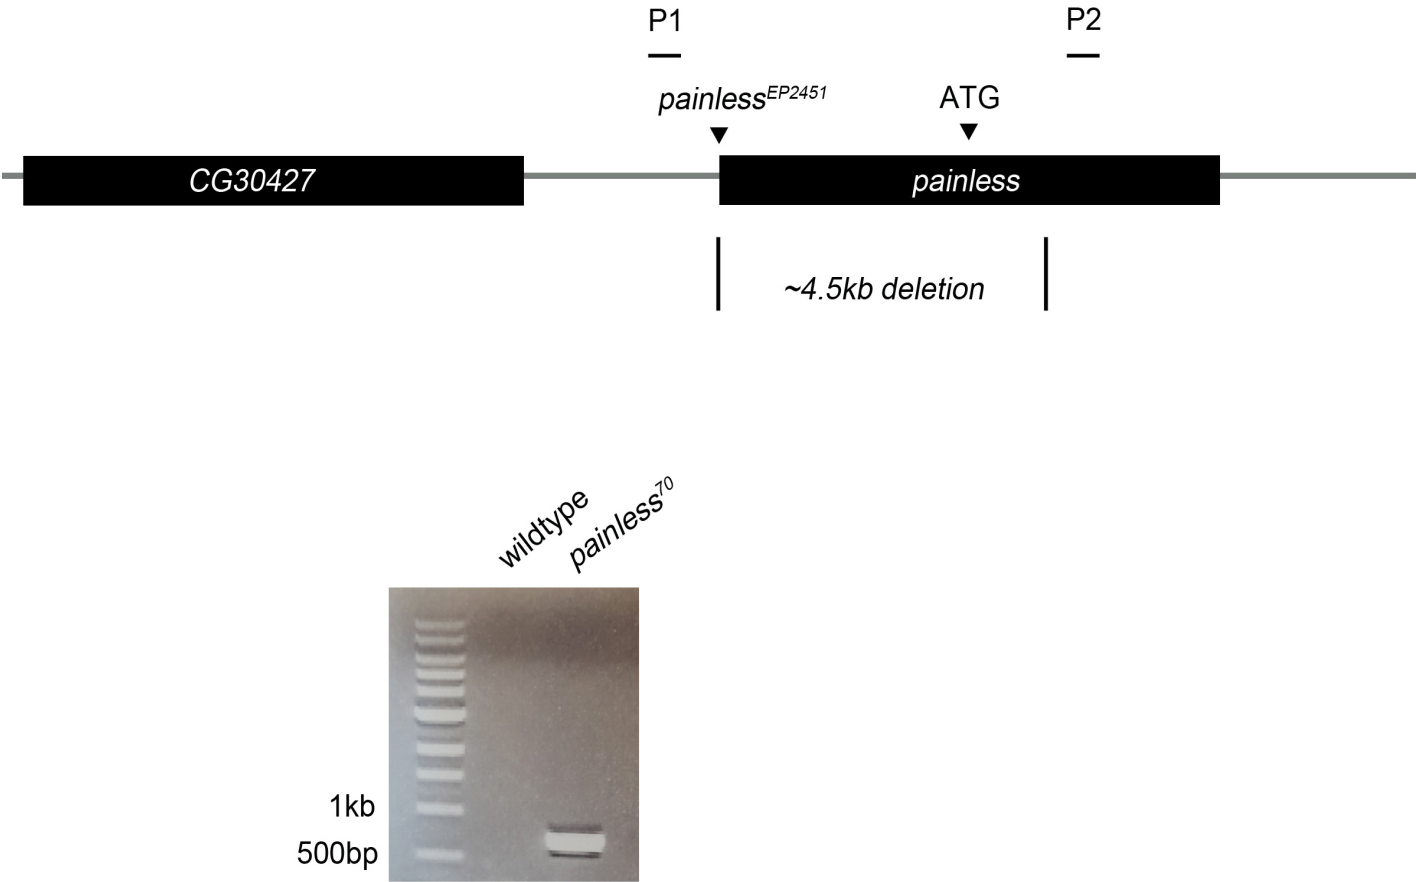

Supplement: supp [file elife-10735-supp-v1.zip › elife_poa_e10735_Figure_5_figure_supplement_3.pdf]

Figure 5 – Figure Supplement 1. Alternative data presentation of thermal allodynia

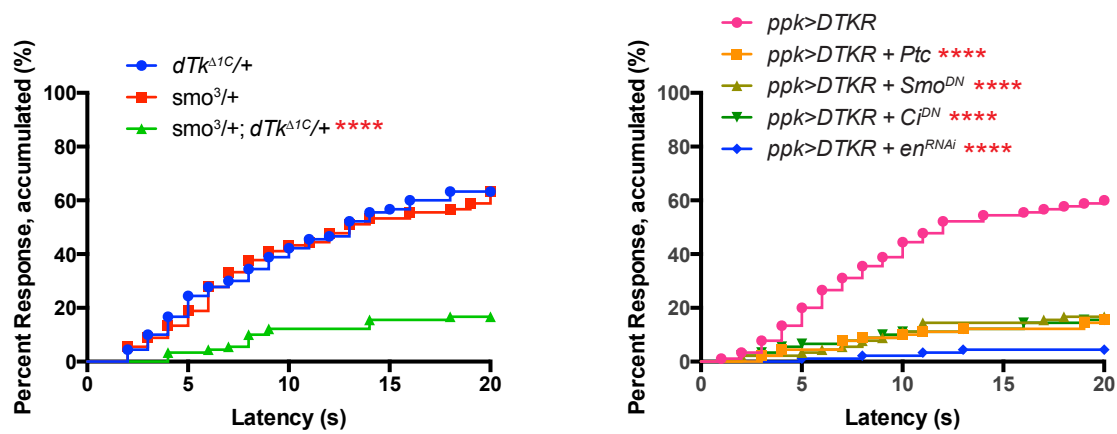

Supplement: supp [file elife-10735-supp-v1.zip › elife_poa_e10735_Figure_5_figure_supplement_1.pdf]

Figure 1 – Figure Supplement 3. Schematic of the *dTk* locus.

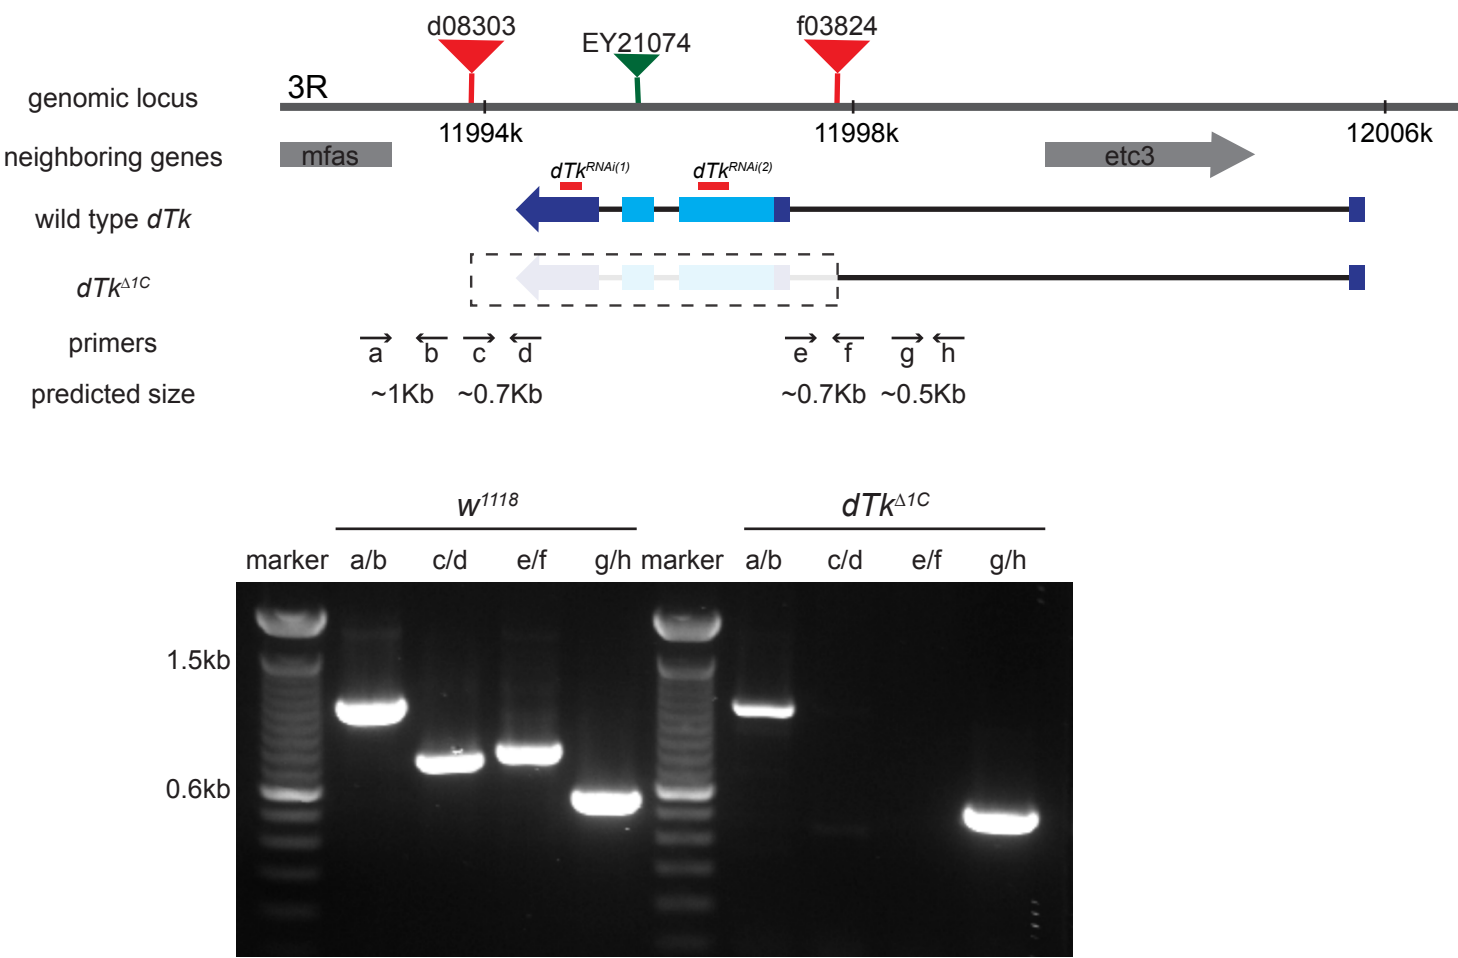

Supplement: supp [file elife-10735-supp-v1.zip › elife_poa_e10735_Figure_1_figure_supplement_3.pdf]

Figure 6 – Figure Supplement 1. RNAi-mediated knockdown of *hh* was not effective

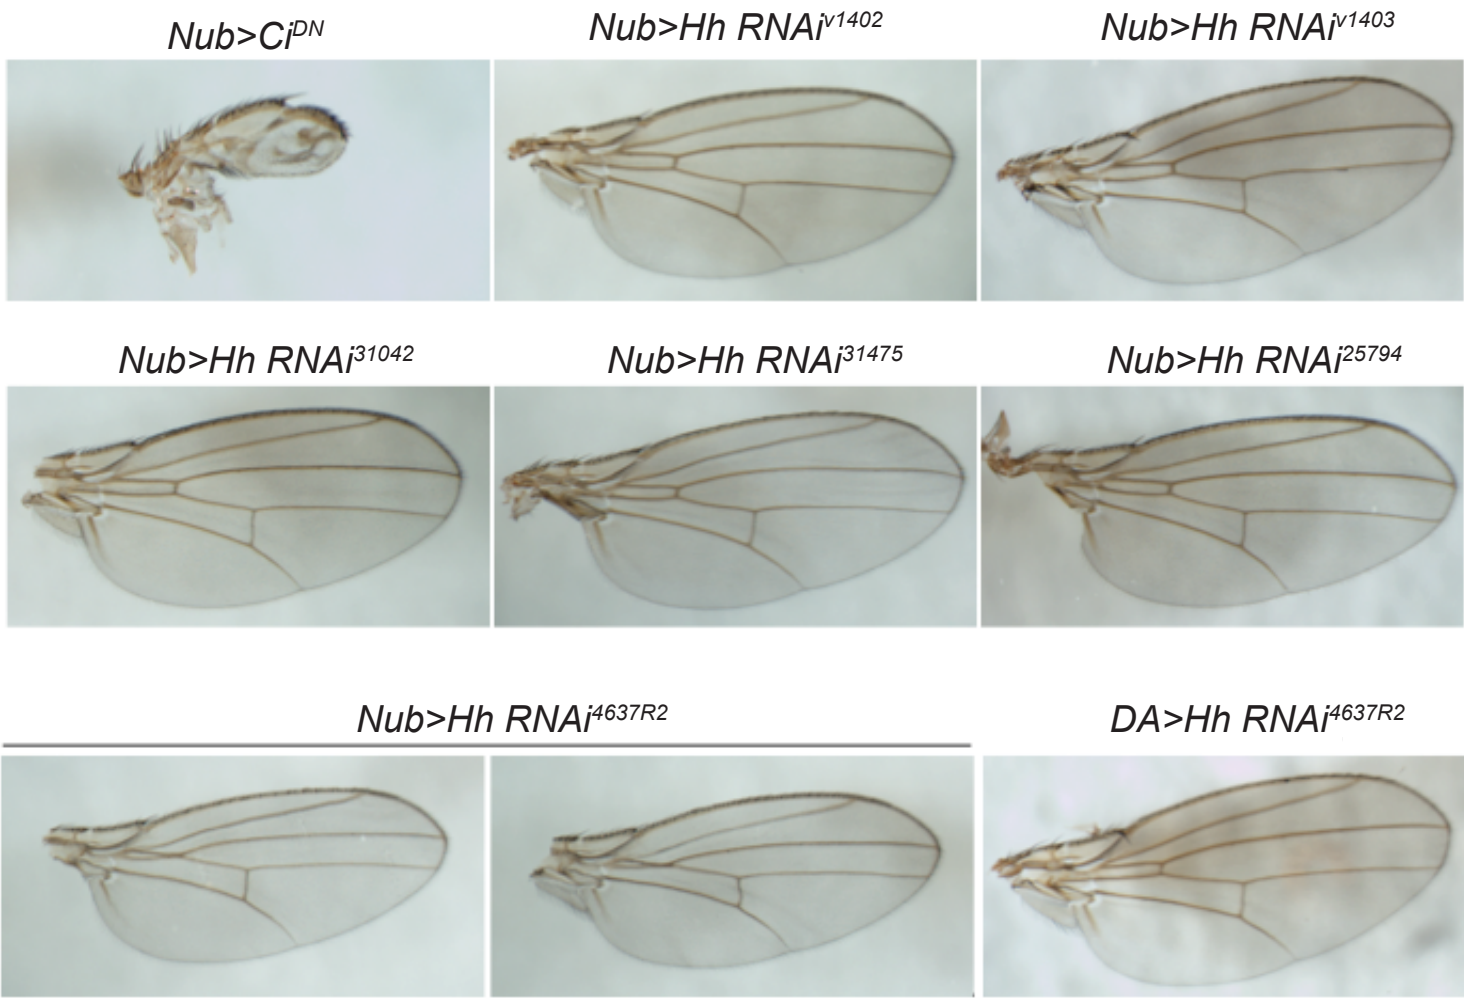

Supplement: supp [file elife-10735-supp-v1.zip › elife_poa_e10735_Figure_6_figure_supplement_1.pdf]

Figure 4 – Figure Supplement 1. Alternative data presentation of UV-induced thermal allodynia

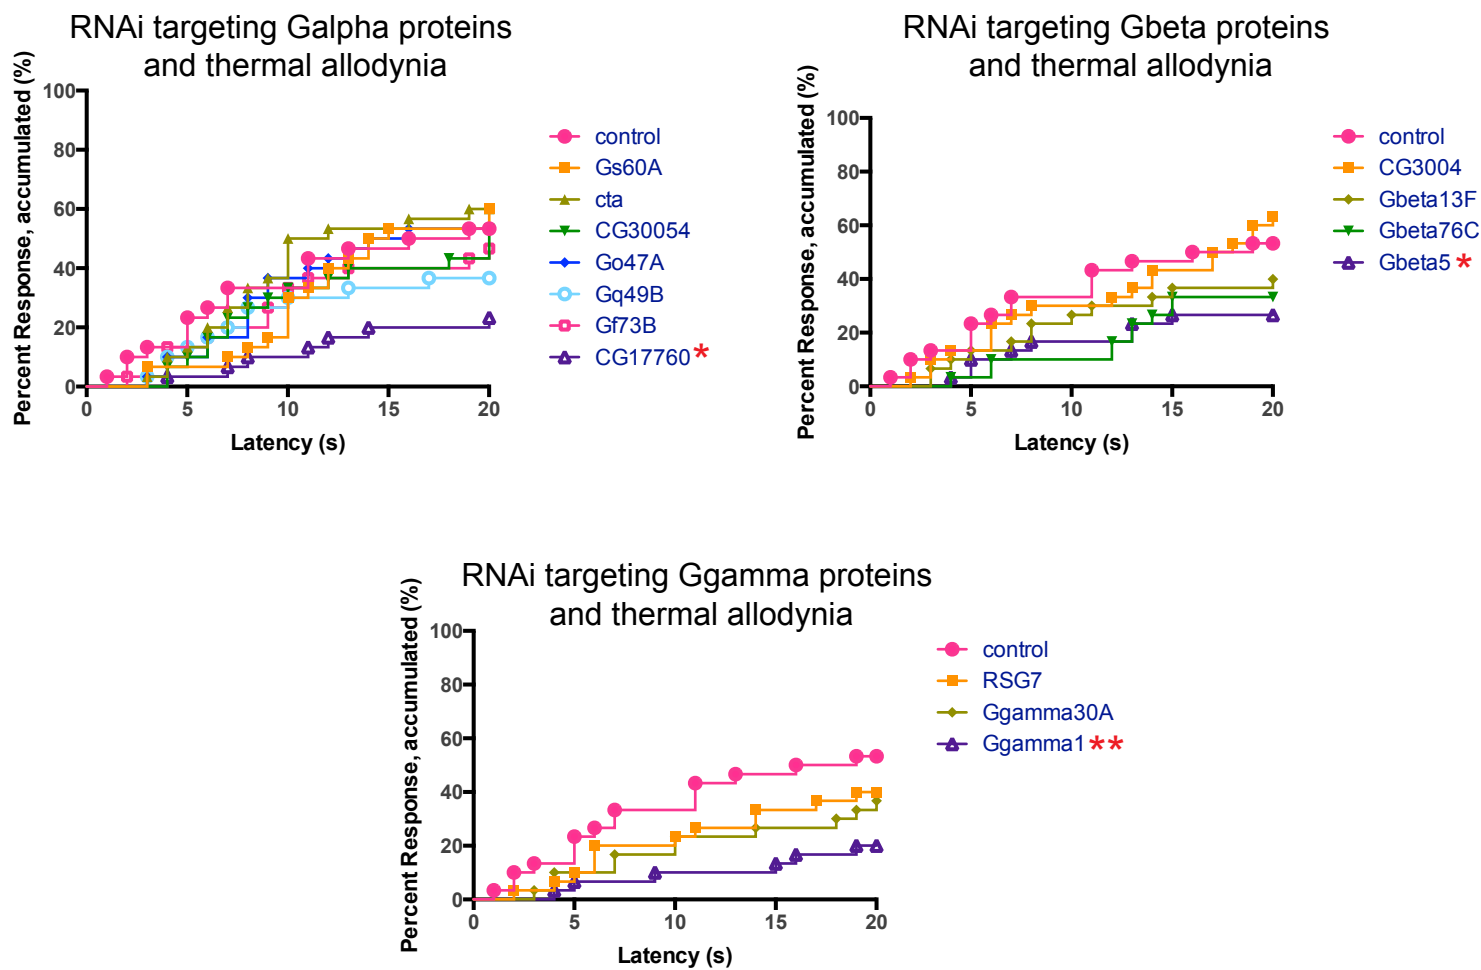

Supplement: supp [file elife-10735-supp-v1.zip › elife_poa_e10735_Figure_4_figure_supplement_1.pdf]

Figure 6 – Figure Supplement 3.

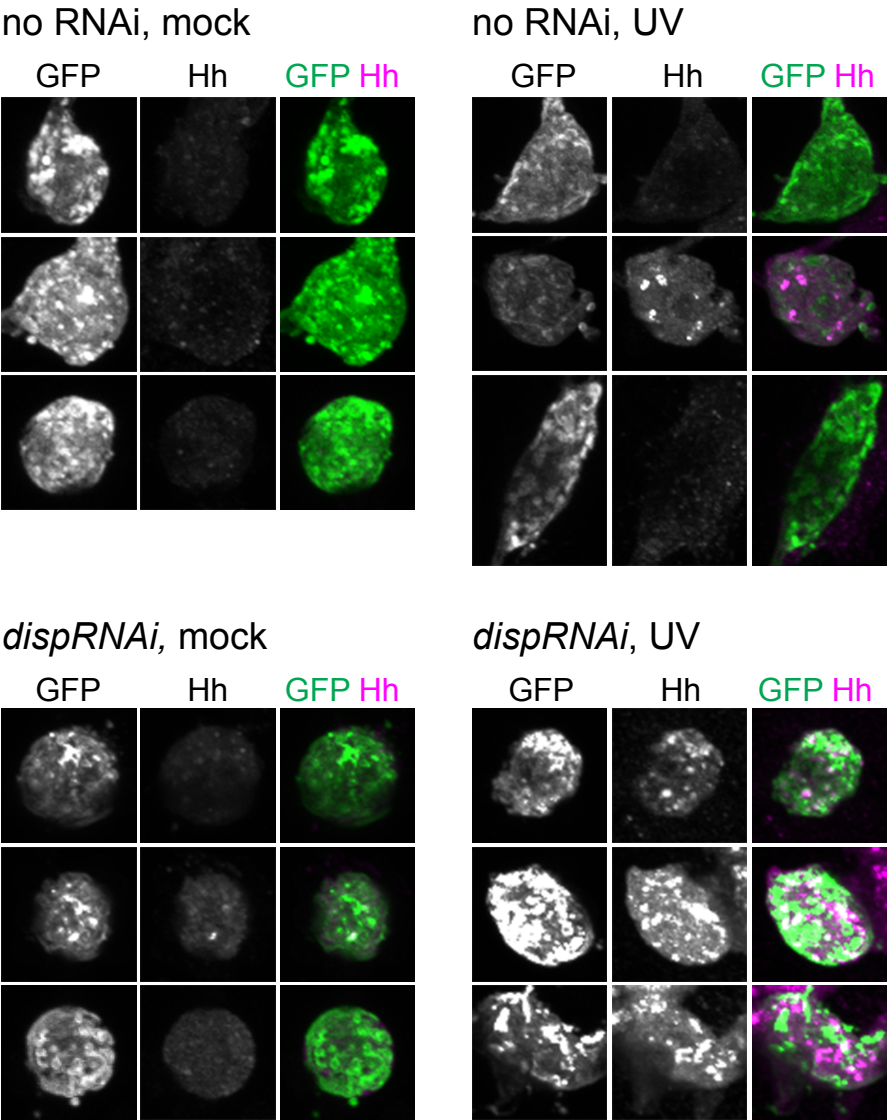

Supplement: supp [file elife-10735-supp-v1.zip › elife_poa_e10735_Figure_6_figure_supplement_3.pdf]

Figure 2 – Figure Supplement 1. Alternative data presentation of thermal allodynia

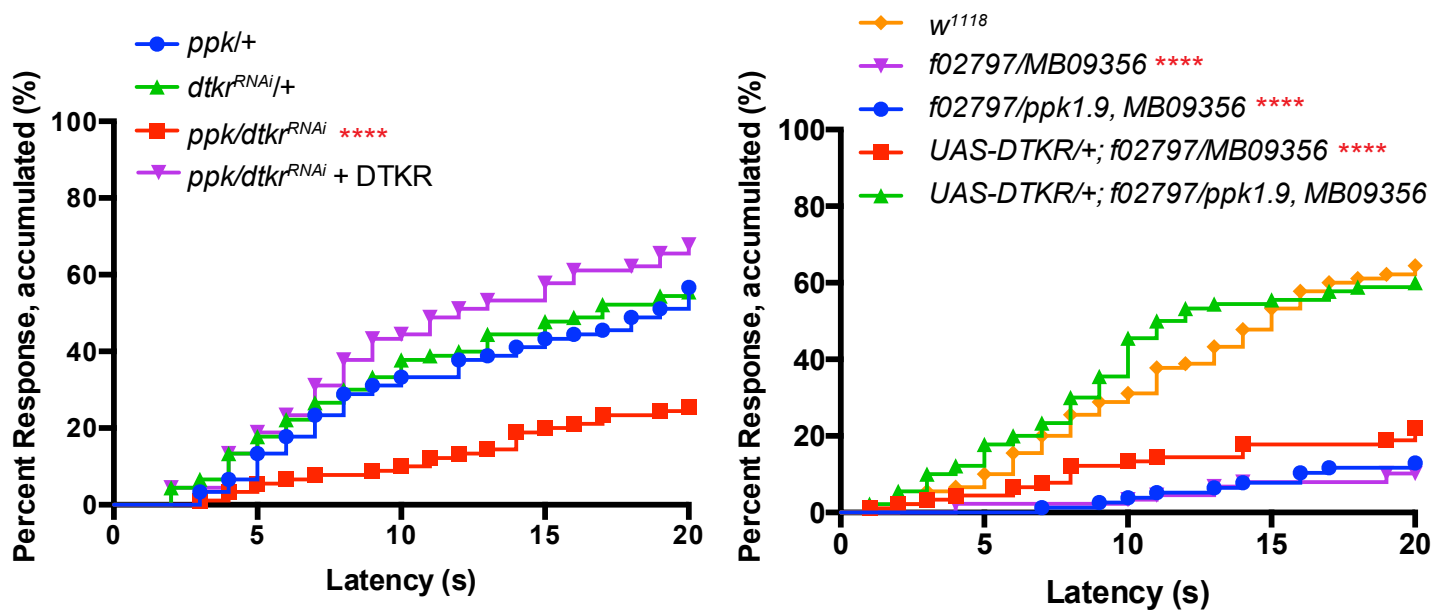

Supplement: supp [file elife-10735-supp-v1.zip › elife_poa_e10735_Figure_2_figure_supplement_1.pdf]
